# Supplementary material for: The anti-hyperlipidemic effect and underlying mechanisms of barley (Hordeum vulgareL.) grass polysaccharides in mice induced by a high-fat diet
Source: Royal Society of Chemistry journal article supplement (doi:10.1039/d3fo01451g), 2023-01-01
Supplement: d3fo01451g1.pdf [file d3fo01451g1.pdf]

**Supplementary Material:**

**Figure S1.** Specaccum species accumulation curve.

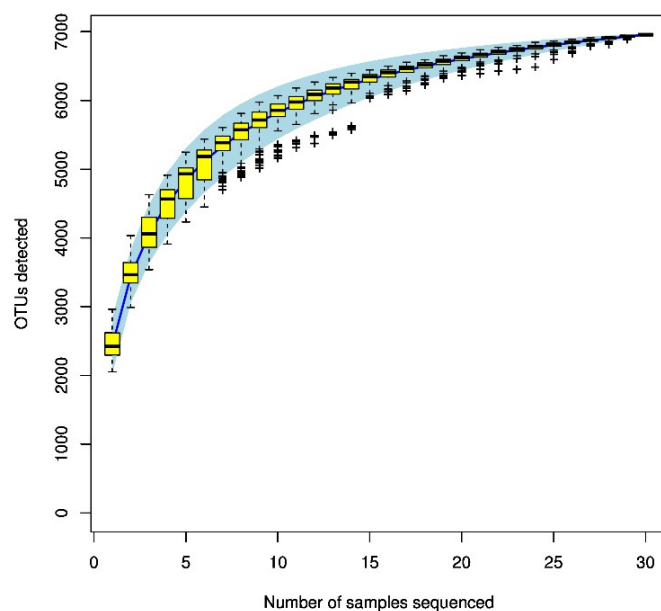

**Figure S2.** Effects of BGP-Z31 on the ratio of *Firmicutes/Bacteroidetes*. Data are expressed as mean  $\pm$  SD ( $n=6$ ). #  $P < 0.05$ , ##  $P < 0.01$ , ###  $P < 0.001$  relative to NC group; \*  $P < 0.05$ , \*\*  $P < 0.01$ , \*\*\*  $P < 0.001$  relative to MC group.

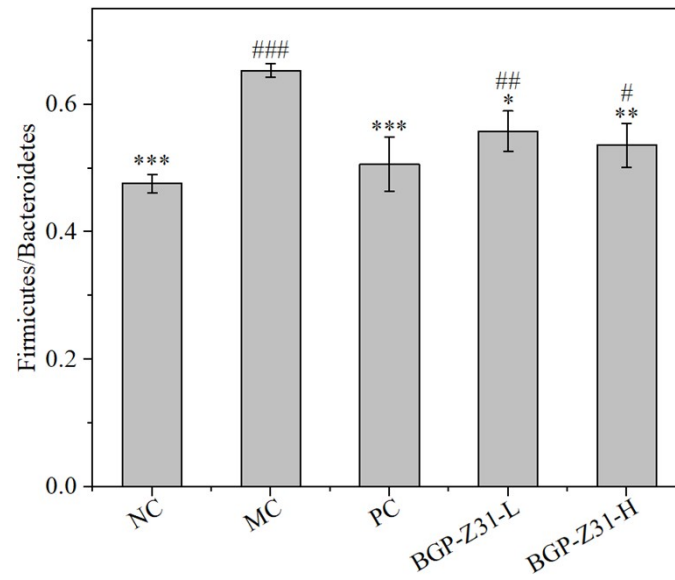

**Table S1.** Raw material compositions of mice feed.

| Raw material           | Normal control diet (g) | High-fat diet (g) |
|------------------------|-------------------------|-------------------|
| Casein                 | 200                     | 200               |
| L-cystine              | 3                       | 3                 |
| Corn starch            | 504                     | 0                 |
| Fructose               | 0                       | 200               |
| Maltodextrin           | 100                     | 100               |
| Sucrose                | 100                     | 100               |
| Cellulose              | 50                      | 50                |
| Soybean oil            | 25                      | 25                |
| Lard oil               | 20                      | 155               |
| Mixed minerals S10026B | 50                      | 50                |
| Vitamin mix V10001C    | 1                       | 1                 |
| Choline bitartrate     | 2                       | 2                 |
| Cholesterol            | 0                       | 18                |
| Total                  | 1055                    | 904               |

**Table S2.** Alpha diversity index of mice in different treatment groups.

| Groups    | Chao1          | Shannon     | Observed-species |
|-----------|----------------|-------------|------------------|
| NC        | 2914.57±147.62 | 6.75±0.24** | 2313.88±106.48   |
| MC        | 3054.93±254.48 | 7.38±0.27## | 2388.43±216.45   |
| PC        | 3004.80±154.46 | 6.90±0.31*  | 2345.10±157.95   |
| BGP-Z31-L | 3002.36±121.46 | 7.05±0.40   | 2384.27±146.24   |
| BGP-Z31-H | 3030.84±294.57 | 7.12±0.52   | 2391.22±282.57   |

Note: #  $P < 0.05$ , ##  $P < 0.01$  relative to NC group; \*  $P < 0.05$ , \*\*  $P < 0.01$  relative to MC group.
